# Supplementary material for: Molecular basis of RNA-binding and autoregulation by the cancer-associated splicing factor RBM39
Source: Springer Nature journal article supplement (doi:10.1038/s41467-023-40254-5), 2023-09-04
Supplement: MOESM1 [file 41467_2023_40254_MOESM1_ESM.pdf]

## Supplementary information

### Molecular basis of RNA-binding and autoregulation by the cancer-associated splicing factor

#### RBM39

Sébastien Campagne<sup>1,2,\*</sup>, Daniel Jutzi<sup>3</sup>, Florian Malard<sup>1,2</sup>, Maja Matoga<sup>1</sup>, Ksenija Romane<sup>1</sup>, Miki Feldmuller<sup>1</sup>, Martino Colombo<sup>4,5</sup>, Marc-David Ruepp<sup>3,\*</sup> and Frédéric H-T. Allain<sup>1,\*</sup>

<sup>1</sup>ETH Zurich, Department of Biology, Institute of Biochemistry, 8093 Zurich, Switzerland; <sup>2</sup>University of Bordeaux, Inserm U1212, CNRS UMR5320, ARNA Laboratory, 33077 Bordeaux, France; <sup>3</sup>United Kingdom Dementia Research Institute Centre, Institute of Psychiatry, Psychology and Neuroscience, King's College London, Maurice Wohl Clinical Neuroscience Institute, London SE5 9NU, United Kingdom; <sup>4</sup>University of Bern, Department of Chemistry and Biochemistry, 3012 Bern, Switzerland; <sup>5</sup>Celgene Institute of Translational Research in Europe (CITRE), Bristol Myers Squibb, 41092 Seville, Spain.

SC and DJ contributed equally to this work.

\*Correspondence should be addressed to [allain@bc.biol.ethz.ch](mailto:allain@bc.biol.ethz.ch), [marc-david.ruepp@kcl.ac.uk](mailto:marc-david.ruepp@kcl.ac.uk) or [sebastien.campagne@inserm.fr](mailto:sebastien.campagne@inserm.fr)

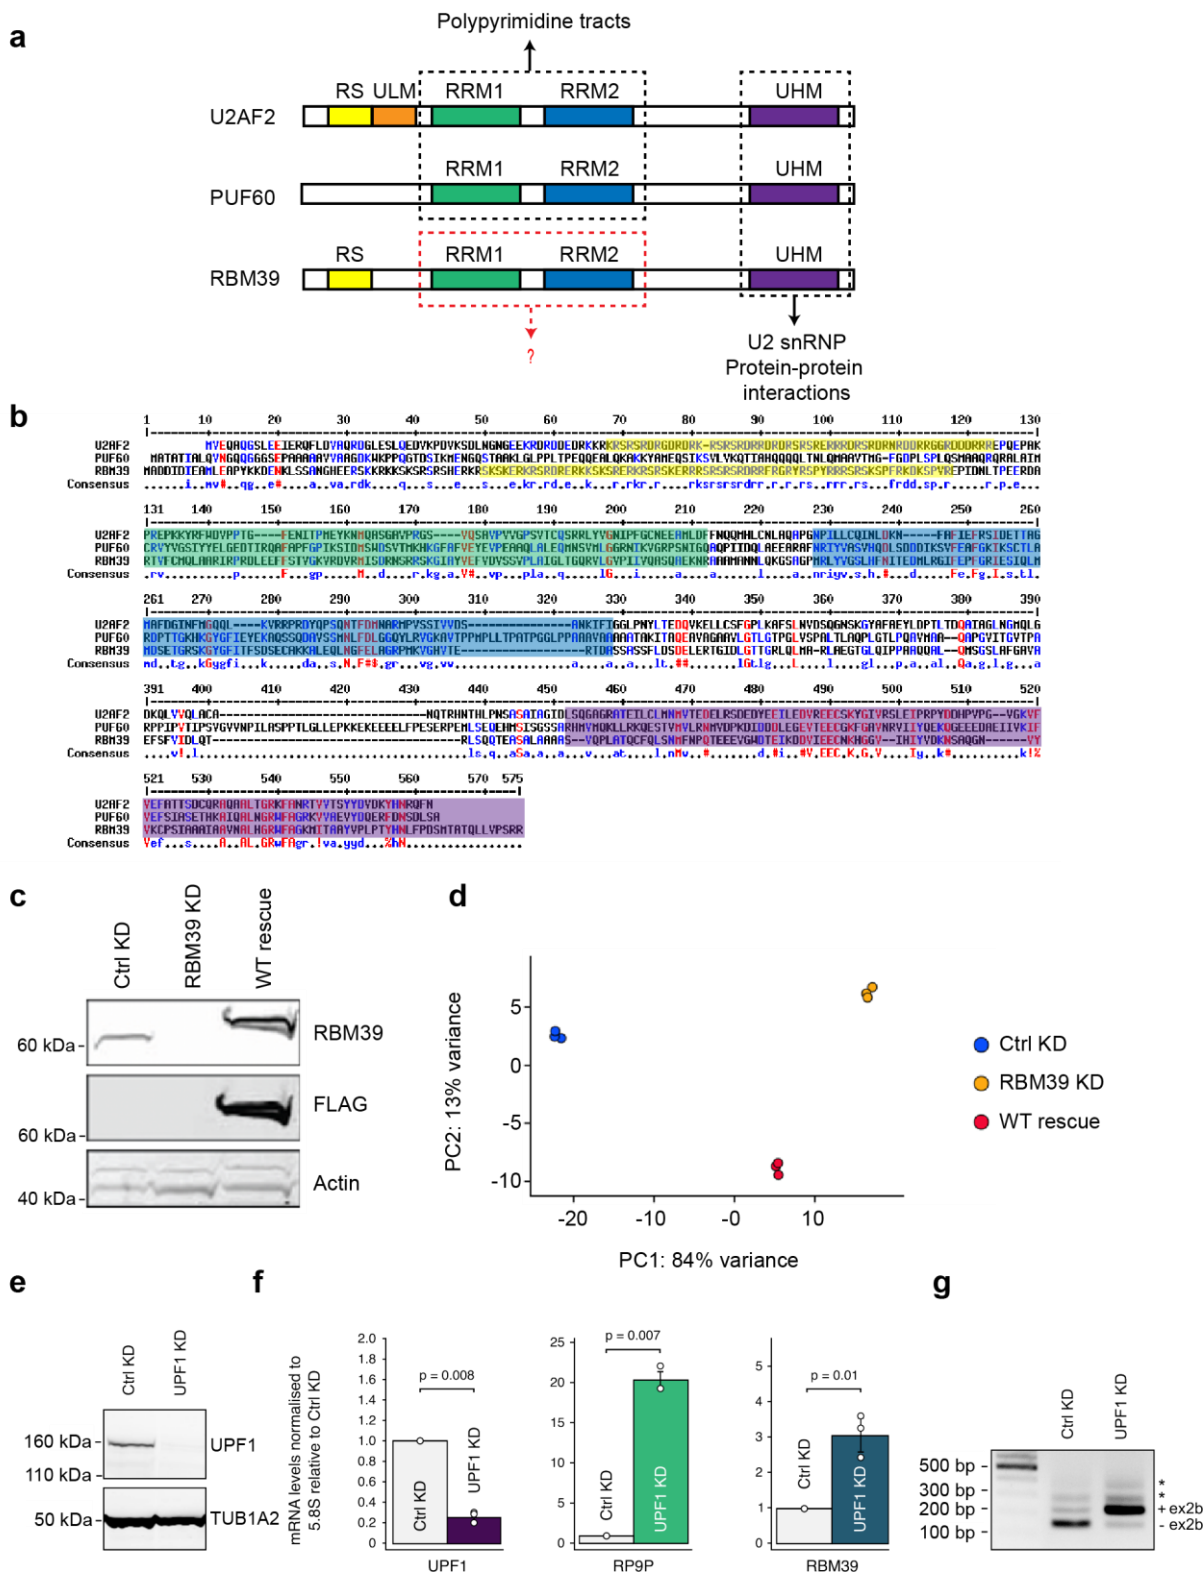

**Supplementary Fig. 1: RBM39 is homologous to U2AF2 and PUF60 and it promotes the inclusion of a poison exon in own pre-mRNA.** **a**, Domain organisation of RBM39, U2AF2 and PUF60. **b**, Sequence alignment of RBM39, U2AF2 and PUF60. **c**, Western blot analysis showing the efficiency of RBM39 siRNA knock down and its rescue with FLAG-RBM39. This experiment was repeated three times and led to similar results ( $n = 3$ ). **d**, Principal component analysis of the 9 samples that were analysed by RNA-Seq. **e**, Western blot showing the knock down of UPF1. **f**, Bar plots showing the

mRNA abundance of UPF1, PRP9 and RBM39 in wild type conditions and after UPF1 knock down. Average values and standard deviations of three biological replicates ( $n = 3$ ) are shown. P values were computed from log-transformed ratios using two-sided t-test. **g**, Agarose gel showing the accumulation of the RBM39 non-productive mRNA isoform in the UPF1 knock down conditions (UPF1 KD). In control conditions (Ctrl KD), the RBM39 non-productive mRNA isoform is degraded via non-mediated decay pathway. This experiment was repeated three times and led to similar results.

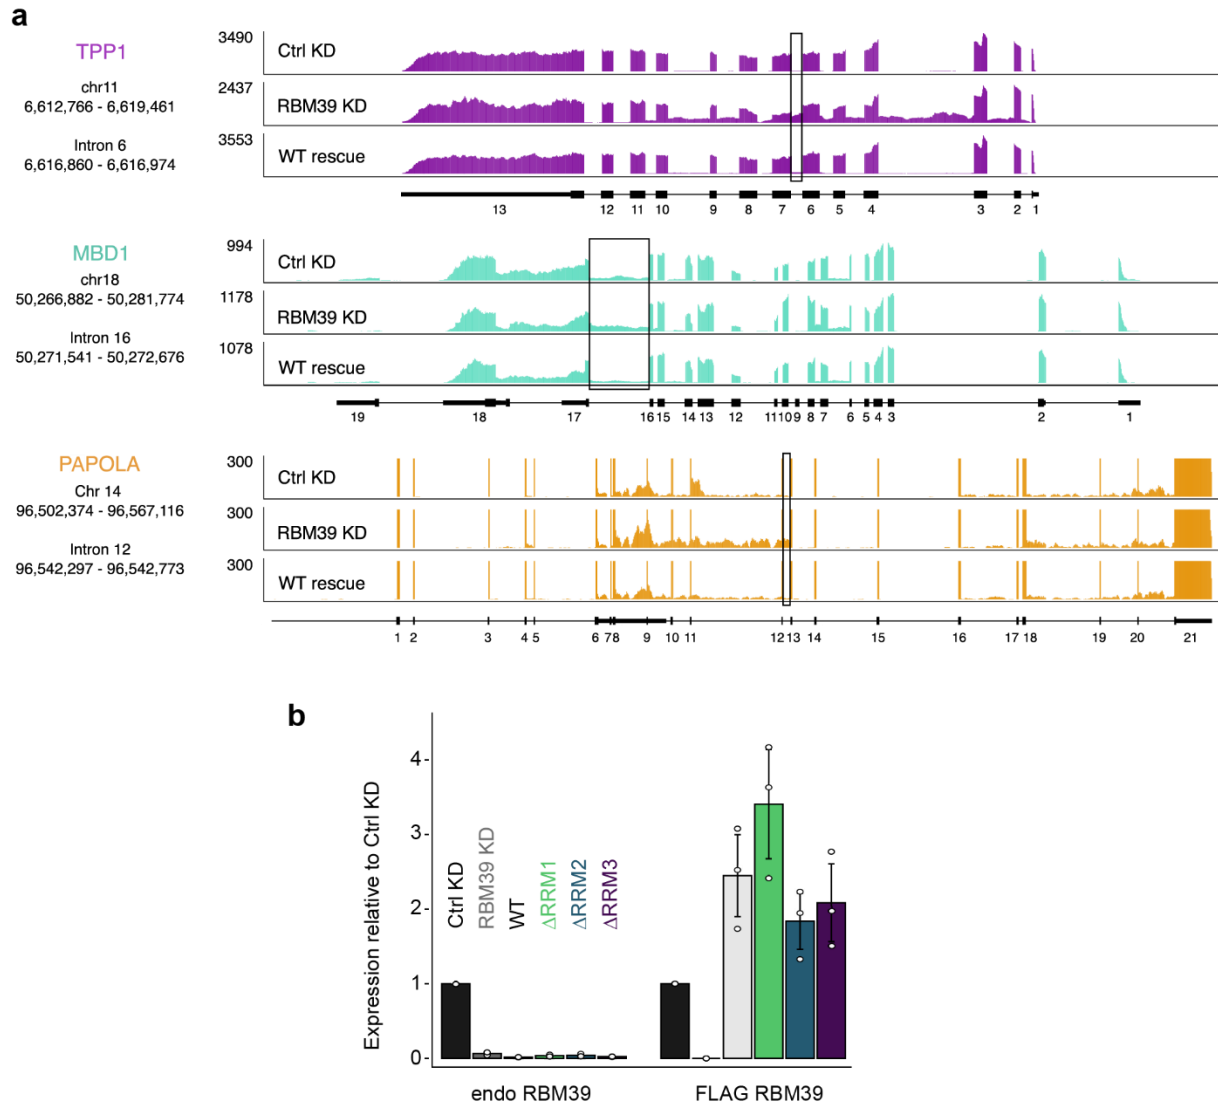

**Supplementary Fig. 2: RBM39-dependent intron retention events and protein expression quantification.** **a**, Sashimi plots showing RNA sequencing reads detected for three genes for *TPP1*, *MBD1* and *PAPOLA* upon control (Ctrl KD) or RBM39 knock down (RBM39 KD) and after FLAG-RBM39 rescue (FLAG-RBM39 rescue). In the *TPP1* gene, several intron retention events are RBM39-dependent. **b**, Quantification of the western blot shown in Figure 2a, showing the level of expression of the RBM39 mutants and FLAG-RBM39 mutants relative to the control KD condition. Average values and standard deviations of three biological replicates ( $n = 3$ ) are shown. P values were computed using two-sided t-test.

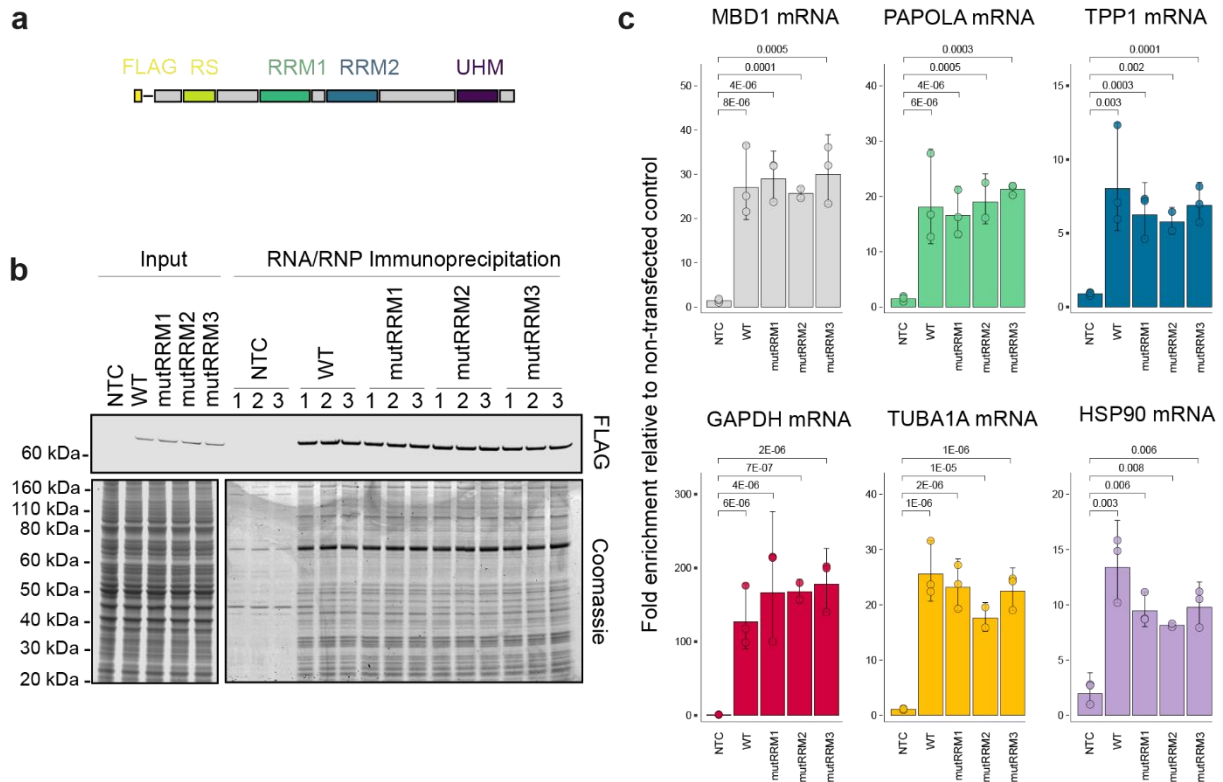

**Supplementary Fig. 3: RNA immunoprecipitation using full-length FLAG-RBM39.** **a**, Schematic representation of FLAG-RBM39. **b**, On top, a western blot probed using anti-FLAG antibodies indicates similar expression of the constructs in the input and confirms efficient immunoprecipitation. The SDS-PAGE gel below was stained using Coomassie blue. **c**, Bar plots showing the fold enrichment relative to non-transfected control for the MBD1, PAPOLA, TPP1, GAPDH, TUBA1A and HSP90 mRNAs co-immunoprecipitated with FLAG-RBM39 and its derivatives. Average values and standard deviations of three biological replicates ( $n = 3$ ) are shown. P values were computed from log-transformed ratios using two-sided unequal variances Welch's t-test.

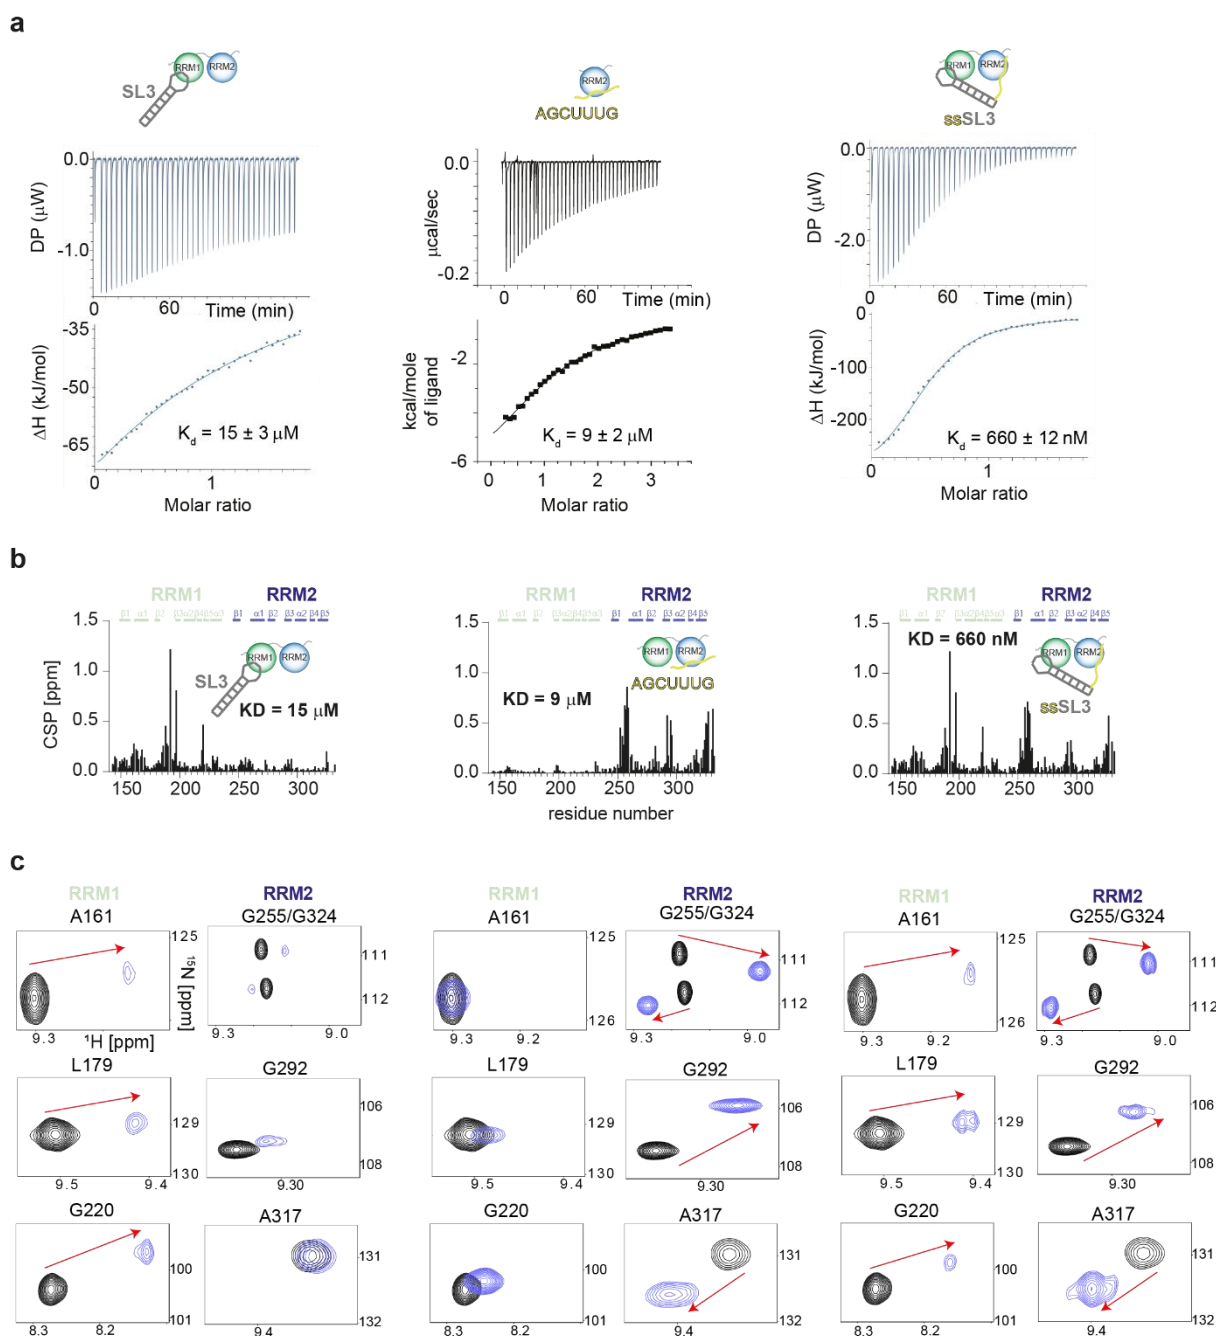

**Supplementary Fig. 4: ITC measurements and NMR titrations.** **a**, From left to right, ITC titrations of RRM12 with SL3, RRM2 with AGCUUUG and of RRM12 and ssSL3. Average dissociation constants and errors are given on the plot ( $n = 3$ ). **b**, Bar plots showing the amide CSPs of RRM12 observed upon addition of either U1 snRNA SL3, the ssRNA motif AGCUUUG or the bipartite RNA motifs AGCUUUG-SL3 (ssSL3). For each NMR titration, the protein was concentrated to  $200 \mu\text{M}$  and the RNA solution stock was at  $2 \text{ mM}$ . **c**, Portions of the 2D  $^1\text{H}$ - $^{15}\text{N}$  HSQC spectra recorded before (black) and after addition of 1 molar equivalent of RNA (blue).

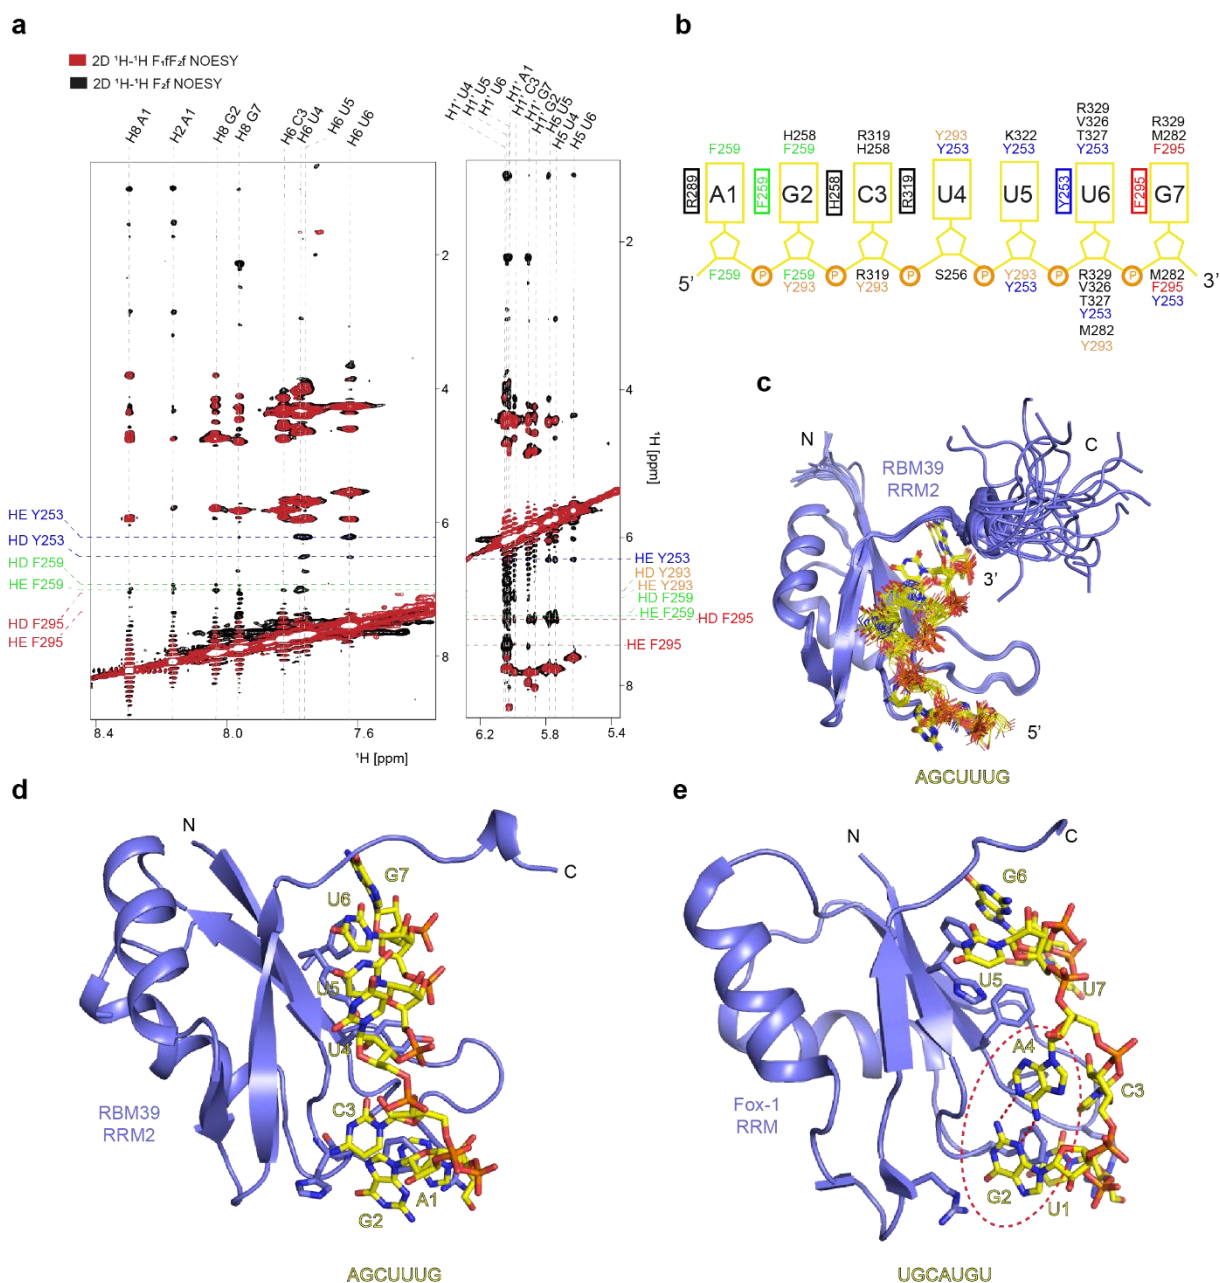

**Supplementary Fig. 5: Identification of intermolecular NOEs, solution structure of the RRM2-AGCUUUG complex and comparison with Fox-1 RRM – RNA interaction.** **a**, Overlay of the 2D  $^1\text{H}$ - $^1\text{H}$  F1fF2f NOESY and 2D  $^1\text{H}$ - $^1\text{H}$  F2f NOESY spectra recorded with a sample of unlabelled AGCUUUG bound to  $^{15}\text{N}$ - $^{13}\text{C}$ -labelled RRM2. The experiment was recorded with a 1 mM protein sample in presence of 1.25 molar equivalent of RNA. **b**, Schematic showing the intermolecular NOEs observed in the NMR data. **c**, Superimposition of the 20 solution structures of the RRM2 – AGCUUUG complex. **d**, Cartoon representation of the lowest energy model of the NMR structure of the RRM2 – AGCUUUG complex. **e**, Cartoon representation of the lowest energy model of the NMR structure of the Fox-1 RRM2 – UGCAUGU complex (PDB ID 2EER). The formation of the intermolecular base pair between A4 and G2 is highlighted by the red ellipse.

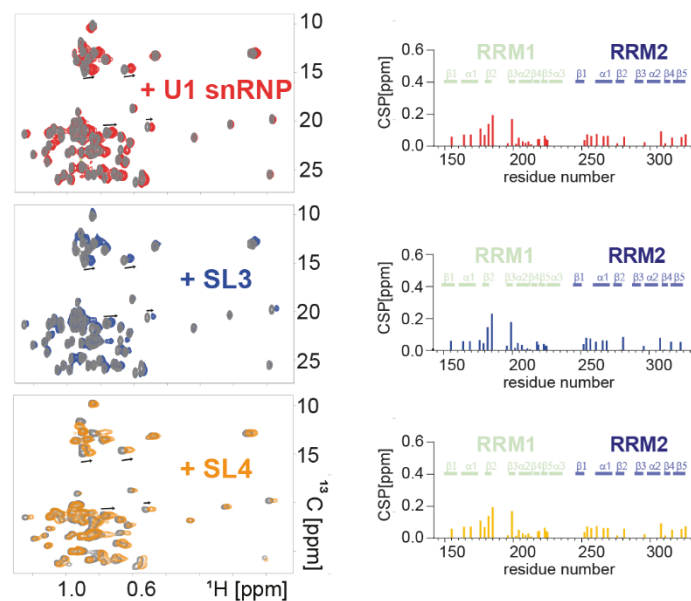

**Supplementary Fig. 6: RBM39 interacts with stem loops of U1 snRNP.** Overlay of the 2D  $^1\text{H}$ - $^{13}\text{C}$  HMQC spectra of RRM12 isolated (grey) and after addition of 1 molar equivalent of either *in vitro* reconstituted U1 snRNP (red), purified U1 snRNA SL3 (blue) or purified U1 snRNA SL4 (orange). The titrations were performed with a 80  $\mu\text{M}$  protein solution, 1 mM RNA stock solutions and 800  $\mu\text{M}$  U1 snRNP. Bar plots showing the methyl chemical shift perturbations (CSP) observed upon addition of either U1 snRNP, U1 snRNA SL3 or SL4 are displayed.



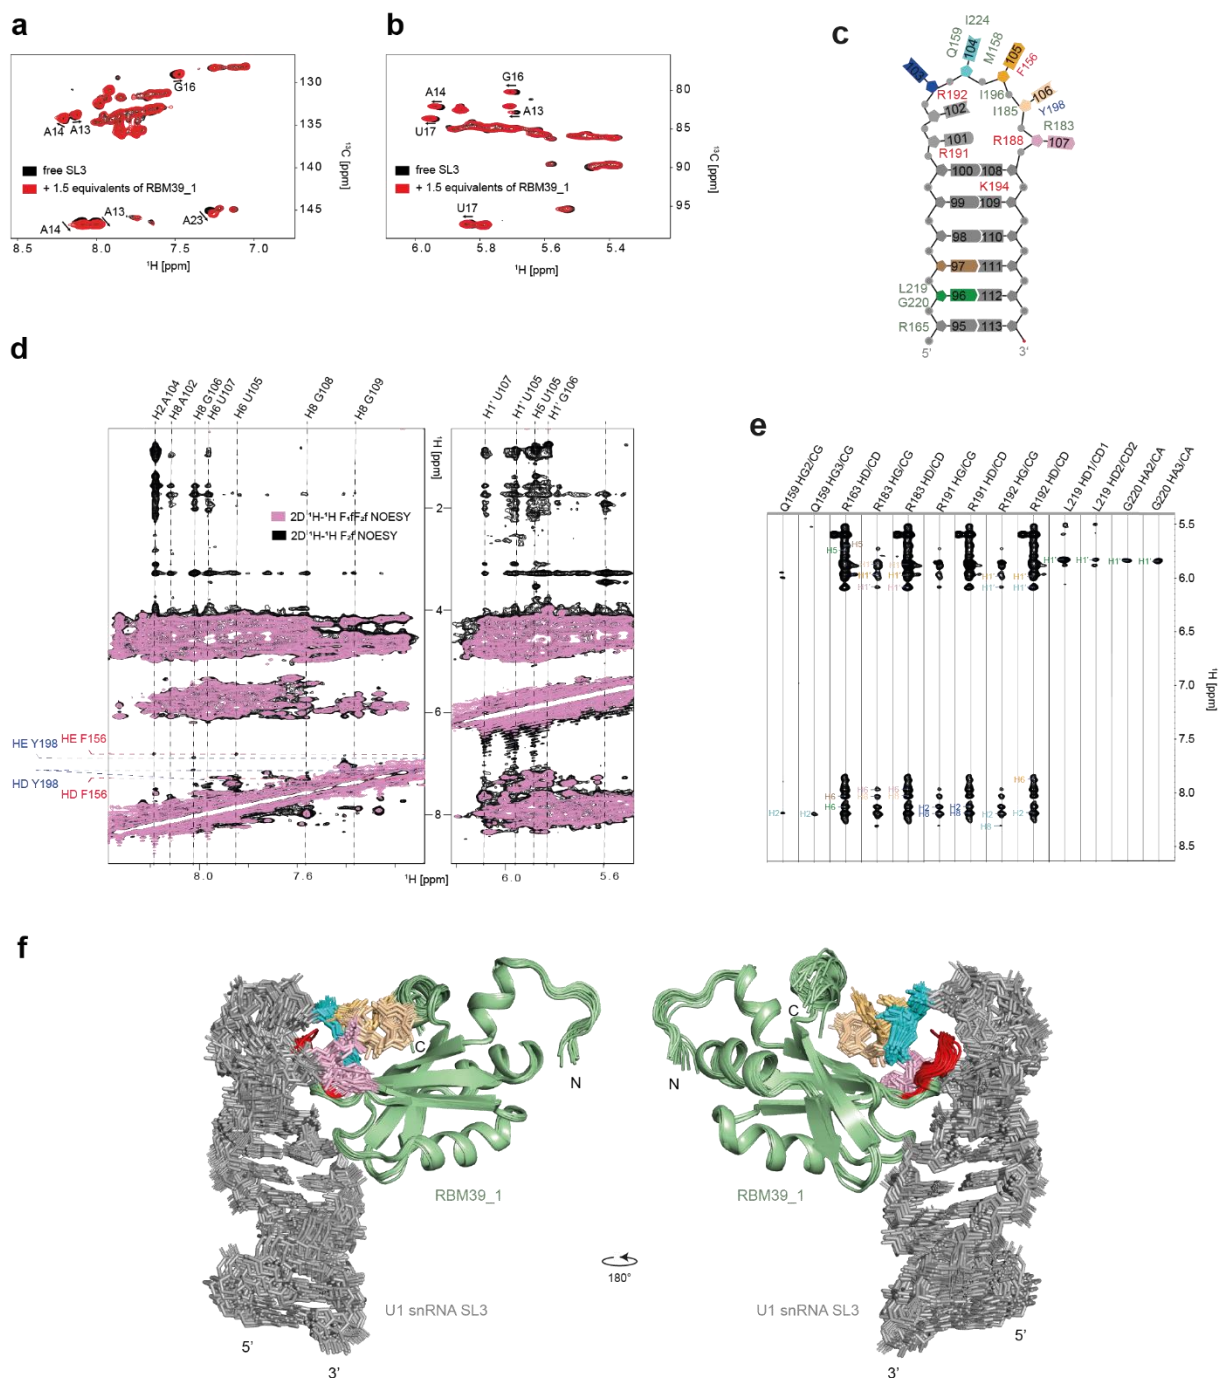

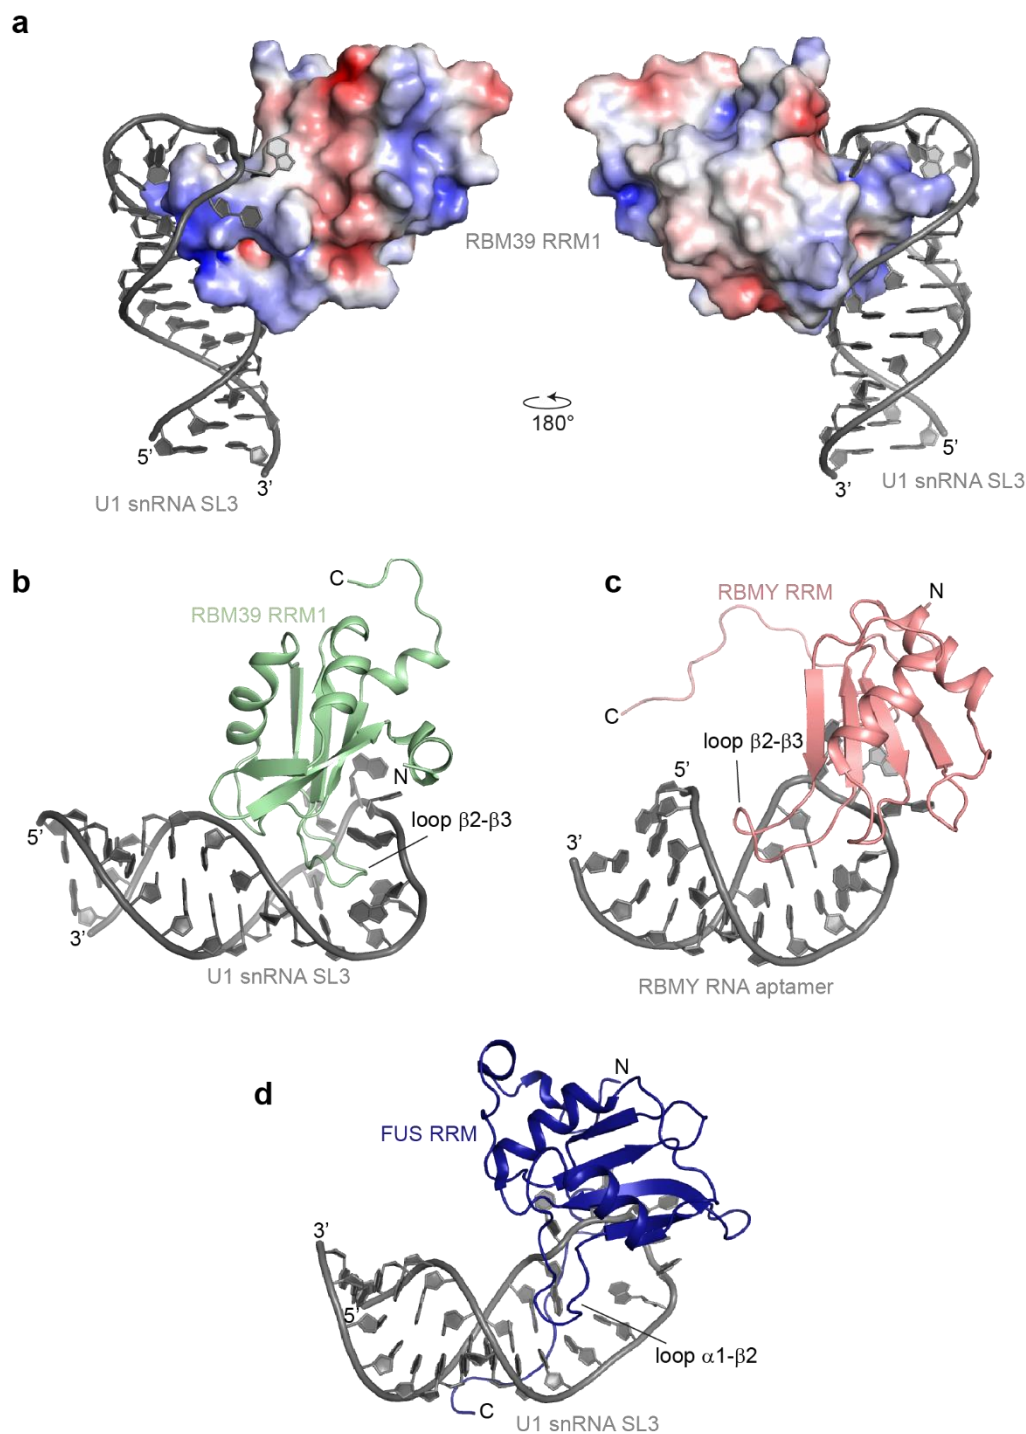

**Supplementary Fig. 8: Structural comparison between RBM39, RBMY and FUS RRM interactions with RNA stem loops.** **a**, Electrostatic potential surface of RRM1 when bound to U1 snRNA SL3. **b**, Cartoon representation of the lowest energy model of the NMR structure of RRM1 bound to U1 snRNA SL3. **c**, Cartoon representation of the lowest energy model of the NMR structure of RBMY bound to RBMY RNA aptamer (PDB ID 2FY1). **d**, Cartoon representation of the lowest energy model of the NMR structure of FUS RRM bound to U1 snRNA SL3 (PDB ID 26SNJ).

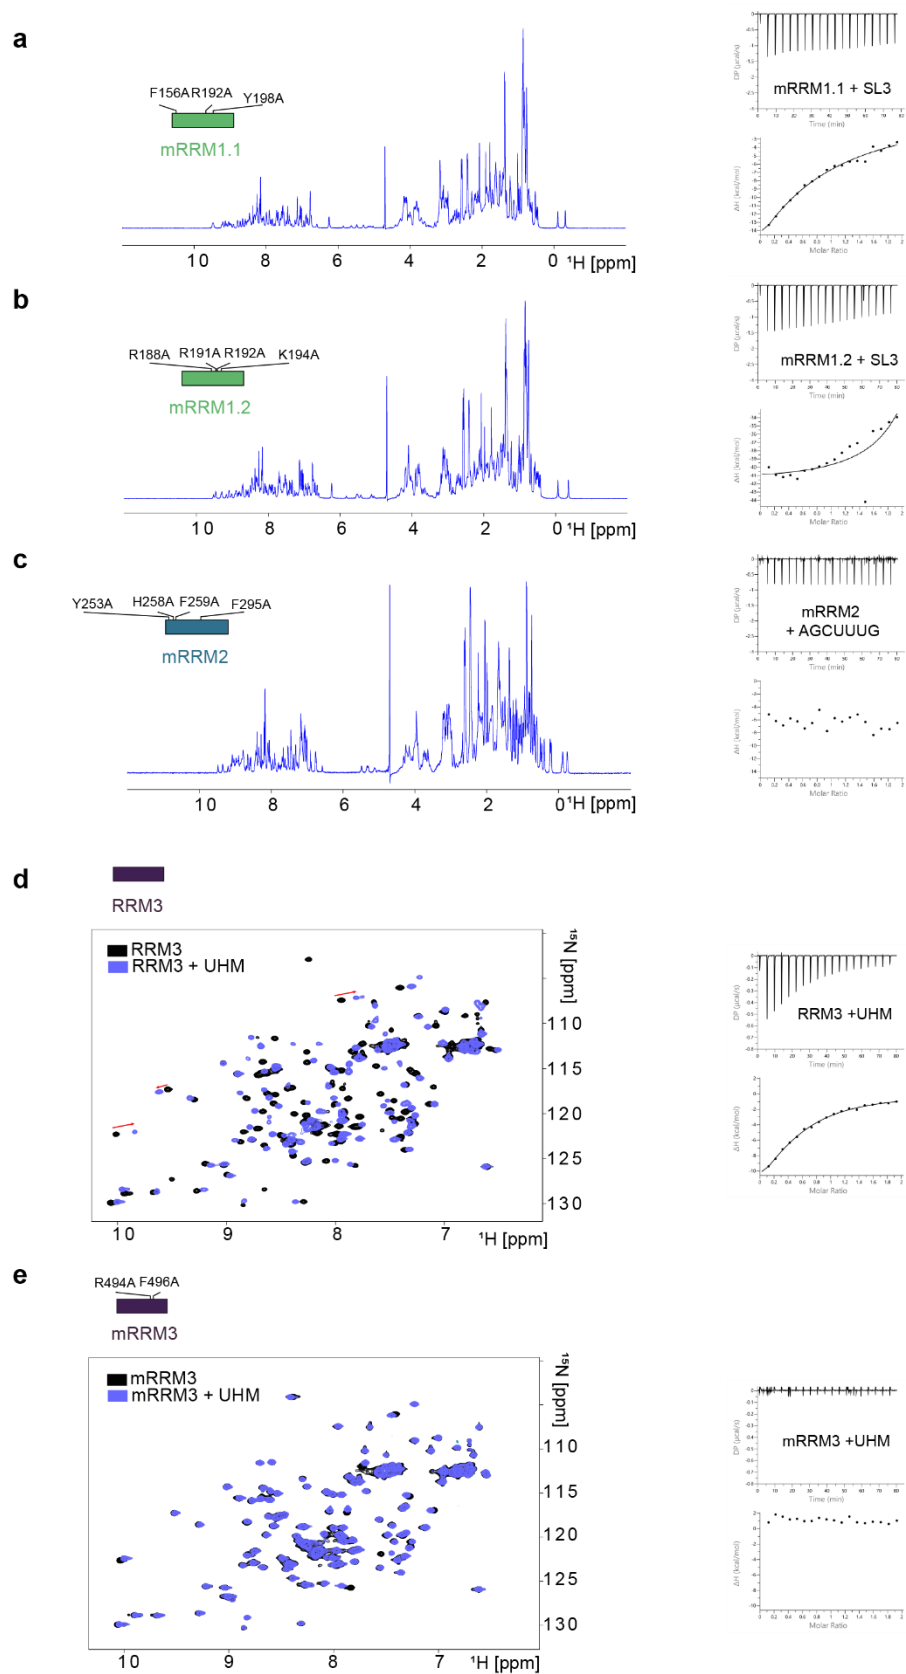

**Extended data Fig. 9: Folding and reduced protein or RNA-binding activities of RBM39 mutants.**  
**a**, 1D  $^1\text{H}$  NMR spectrum of mRRM1.1 recorded with a protein concentration of 80  $\mu\text{M}$ . On the right, the ITC titration of mRRM1.1 with U1 snRNA SL3 is displayed. **b**, 1D  $^1\text{H}$  NMR spectrum of mRRM1.2

recorded with a protein concentration of 80  $\mu$ M. On the right, the ITC titration of mRRM1.2 with U1 snRNA SL3 is displayed. **c**, 1D  $^1$ H NMR spectrum of mRRM2 recorded with a protein concentration of 80  $\mu$ M. On the right, the ITC titration of mRRM1.1 with AGCUUUG is displayed. **d**, Overlay of the 2D  $^1$ H- $^{15}$ N HSQC spectra of RBM39 RRM3 before (black) and after addition of 1,5 molar equivalent of the SF3b155 ULM (KSRWDETP). The spectra were recorded with a protein concentration of 160  $\mu$ M. On the right, the ITC titration of RRM3 with the SF3b155 ULM is displayed. **e**, Overlay of the 2D  $^1$ H- $^{15}$ N HSQC spectra of RBM39 mRRM3 before (black) and after addition of 1,5 molar equivalent of the SF3b155 ULM (KSRWDETP). The spectra were recorded with a protein concentration of 160  $\mu$ M. On the right, the ITC titration of mRRM3 with the SF3b155 ULM is displayed.

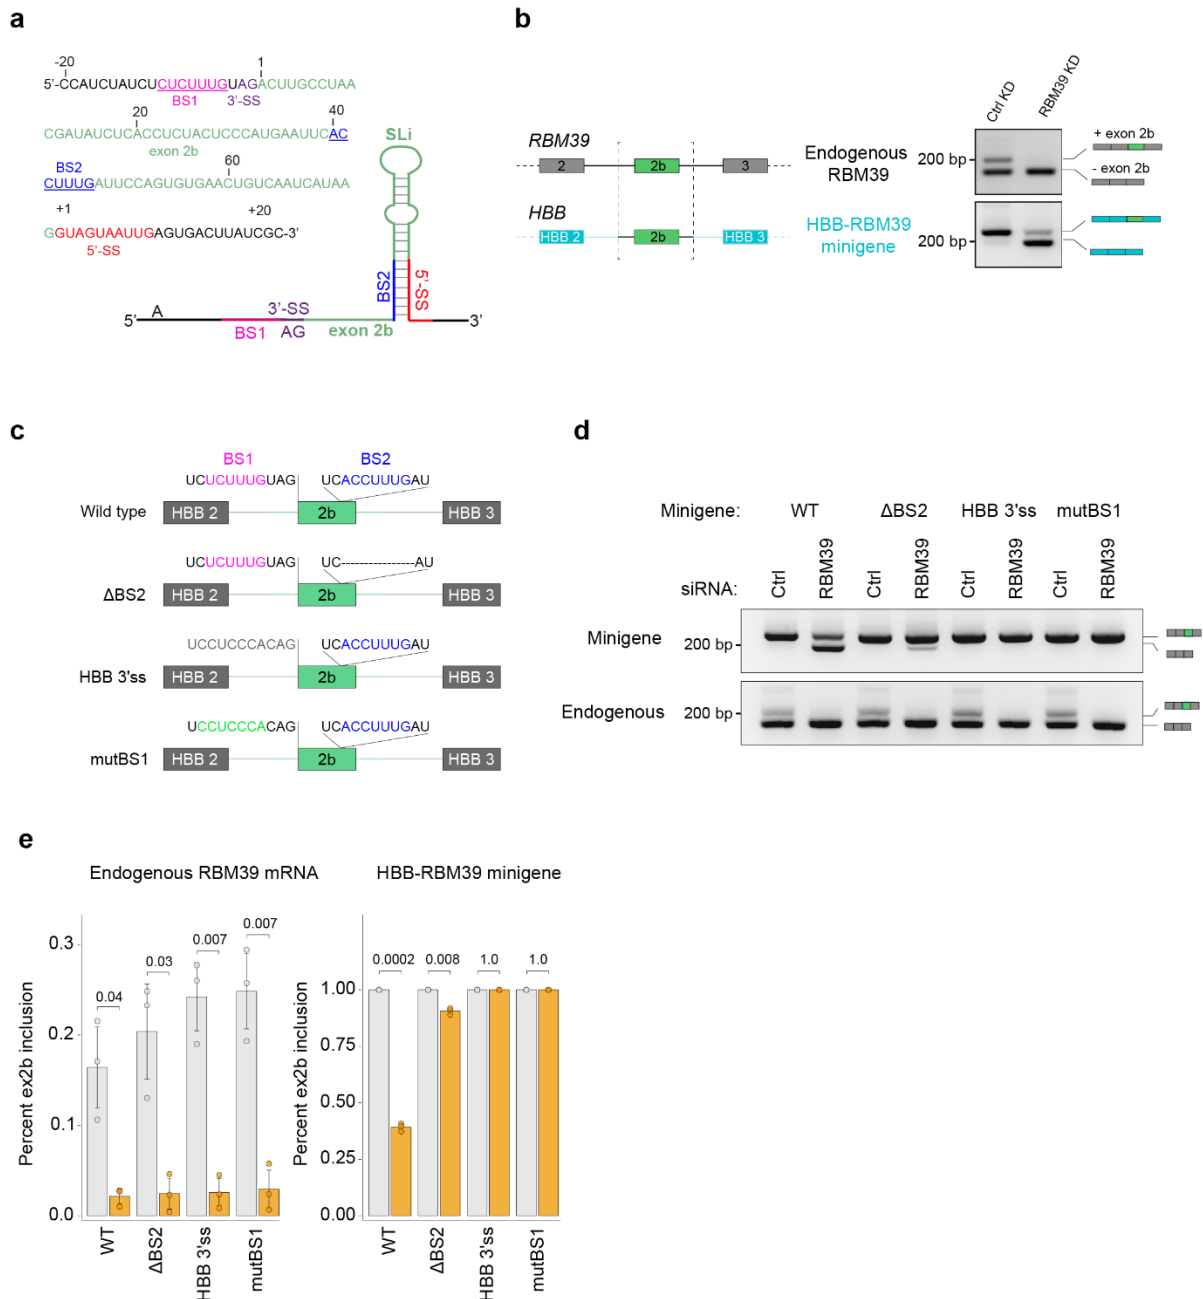

**Supplementary Fig. 10: Identification of the *cis* RNA element responsive for the RBM39 dependency of poison exon inclusion in the genetic context of the human  $\beta$ -globin gene.** **a**, Annotated sequence and predicted secondary structures of the *RBM39* exon 2b and its flanking regions. Below, the hybrid minigene containing the exon 2b in the context of the  $\beta$ -globin gene and the different constructs (WT,  $\Delta$ BS2, HBB 3'ss and mutBS1) are schematically depicted. **b**, Effect of the replacement of the RBM39 poison exon in the genomic context of the  $\beta$ -globin. The splicing of the poison exon was evaluated by RT-PCR in both context upon control KD or RBM39 KD. This experiment was repeated three times and led to similar results. **c**, Schematic representations of the different minigene constructs (WT,  $\Delta$ BS2, HBB 3'ss and mutBS1). **d**, Agarose gel showing the results of the RT-PCR using the different minigene constructs (WT,  $\Delta$ BS2, HBB 3'ss and mutBS1) in control and RBM39 KDs. The splicing of the endogenous RBM39 RNA is also displayed for each condition. **e**, Plot showing the percentage of poison exon inclusion was determined by RT-PCR for the different constructs upon Ctrl KD and RBM39 KD. Average values and standard deviations of three biological replicates ( $n = 3$ ) are shown. P values were computed using two-sided t-test.

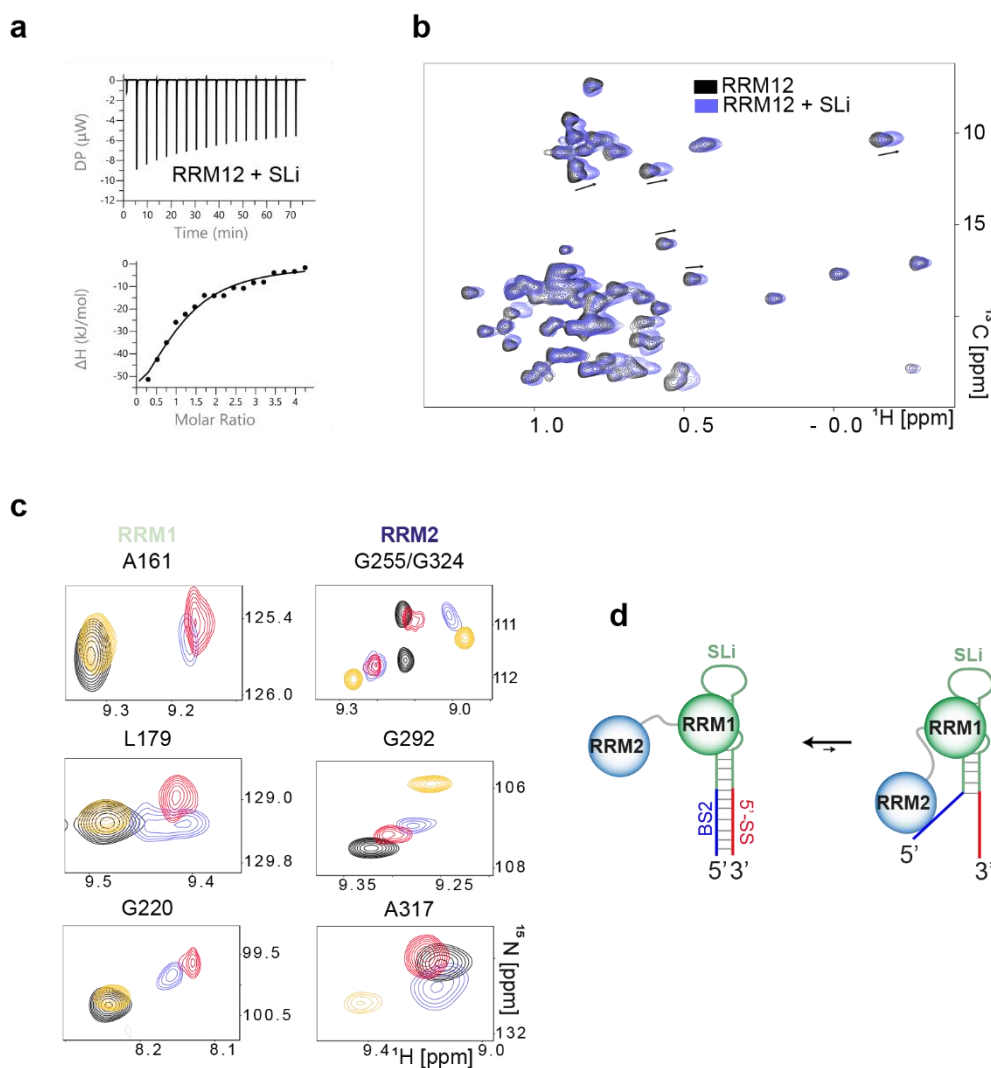

**Supplementary Fig. 11: Probing the interaction between RBM39 RRM12 and SLi.** **a**, ITC titration of RBM39 RRM12 and SLi. **b**, Overlay of the 2D  $^1\text{H}$ - $^{13}\text{C}$  HMQC spectra of RRM12 isolated (black) and after addition of 1 molar equivalent of SLi (blue). The titration was performed with a 80  $\mu\text{M}$  protein solution and 1 mM RNA stock solution. **c**, Overlay of portions of the 2D  $^1\text{H}$ - $^{15}\text{N}$  HSQC spectra of RBM39 before (black) and after addition of 1,5 molar equivalent of either SL3 (red), AGCUUUG (yellow) or SLi (blue). All titrations were performed using a protein concentration of 200  $\mu\text{M}$  and 2 mM RNA solution stocks. **d**, Schematic showing the binding of RBM39 RRM12 to SLi *in vitro*. The scheme explains the line broadening effect observed during the titration by a potential mechanism of chemical exchange. The binding of RRM2 to BS2 will compete with the formation of a secondary structure.

**Supplementary Table 1 - NMR and refinement statistics for RBM39 RRM1 in complex with SL3**

|                                              | <b>RRM1</b>         | <b>SL3</b>      |
|----------------------------------------------|---------------------|-----------------|
| <b>NMR distance and dihedral constraints</b> |                     |                 |
| Distance restraints                          |                     |                 |
| Total NOE                                    | 2,200               | 319             |
| Intra-residue                                | 457                 | 131             |
| Inter-residue                                | 1,743               | 188             |
| Sequential ( $ i - j  = 1$ )                 | 561                 | 126             |
| Nonsequential ( $ i - j  > 1$ )              | 1,182               | 52              |
| Hydrogen bonds                               | 9                   | 10              |
| Protein–nucleic acid intermolecular          | 66                  |                 |
| Total dihedral angle restraints              |                     |                 |
| Protein                                      |                     |                 |
| $\phi$                                       | 72                  |                 |
| $\psi$                                       | 72                  |                 |
| Nucleic acid                                 |                     |                 |
| Base pair                                    |                     | 10              |
| Sugar pucker                                 |                     | 84              |
| Backbone                                     |                     | 56              |
| <b>Structure statistics</b>                  |                     |                 |
| Violations (mean and s.d.)                   |                     |                 |
| Distance constraints (Å) $> 0.4$ Å           | $2.0 \pm 1.2$       |                 |
| Dihedral angle constraints (°) $> 5^\circ$   | $2.5 \pm 10.9$      |                 |
| Max. dihedral angle violation (°)            | $6.09 \pm 1.34$     |                 |
| Max. distance constraint violation (Å)       | $0.51 \pm 0.19$     |                 |
| Deviations from idealized geometry           |                     |                 |
| Bond lengths (Å)                             | $0.0038 \pm 0.0013$ |                 |
| Bond angles (°)                              | $1.452 \pm 0.484$   |                 |
| Average pairwise r.m.s. deviation** (Å)      |                     |                 |
| Protein                                      |                     |                 |
| Heavy                                        | $0.40 \pm 0.14$     |                 |
| Backbone                                     | $0.86 \pm 0.17$     |                 |
| RNA                                          |                     |                 |
| All RNA heavy                                |                     | $0.79 \pm 0.22$ |
| RNA binding site                             |                     | $0.82 \pm 0.20$ |
| Complex                                      |                     |                 |
| All complex heavy (C, N, O, P)               | $0.68 \pm 0.17$     |                 |
| Protein and nucleic acid heavy               | $0.92 \pm 0.17$     |                 |

\*\* RMSD range calculated with the 20 structures of the NMR ensemble with the following residue ranges: 143-283 for the protein and 94-118 for the RNA.

**Supplementary Table 2 - NMR and refinement statistics for RBM39 RRM2 in complex with 5'-AGCUUUG-3'**

|                                                           | RRM2                | AGCUUUG         |
|-----------------------------------------------------------|---------------------|-----------------|
| <b>NMR distance and dihedral constraints</b>              |                     |                 |
| Distance restraints                                       |                     |                 |
| Total NOE                                                 | 2,214               | 58              |
| Intra-residue                                             | 427                 | 50              |
| Inter-residue                                             | 1,787               | 8               |
| Sequential ( $ i - j  = 1$ )                              | 526                 | 8               |
| Nonsequential ( $ i - j  > 1$ )                           | 1,261               | 0               |
| Hydrogen bonds                                            | 32                  |                 |
| Protein–nucleic acid intermolecular                       | 84                  |                 |
| Total dihedral angle restraints                           |                     |                 |
| Protein                                                   |                     |                 |
| $\phi$                                                    | 75                  |                 |
| $\psi$                                                    | 75                  |                 |
| Nucleic acid                                              |                     |                 |
| Base pair                                                 |                     | 0               |
| Sugar pucker                                              |                     | 0               |
| Backbone                                                  |                     | 0               |
| <b>Structure statistics</b>                               |                     |                 |
| Violations (mean and s.d.)                                |                     |                 |
| Distance constraints ( $\text{\AA}$ ) $> 0.4 \text{ \AA}$ | $2.6 \pm 1.4$       |                 |
| Dihedral angle constraints ( $^\circ$ ) $> 5^\circ$       | $2.5 \pm 0.9$       |                 |
| Max. dihedral angle violation ( $^\circ$ )                | $6.02 \pm 3.96$     |                 |
| Max. distance constraint violation ( $\text{\AA}$ )       | $0.52 \pm 0.19$     |                 |
| Deviations from idealized geometry                        |                     |                 |
| Bond lengths ( $\text{\AA}$ )                             | $0.0041 \pm 0.0001$ |                 |
| Bond angles ( $^\circ$ )                                  | $1.404 \pm 0.008$   |                 |
| Average pairwise r.m.s. deviation** ( $\text{\AA}$ )      |                     |                 |
| Protein                                                   |                     |                 |
| Heavy                                                     | $0.20 \pm 0.04$     |                 |
| Backbone                                                  | $0.45 \pm 0.06$     |                 |
| RNA                                                       |                     |                 |
| All RNA heavy                                             |                     | $0.72 \pm 0.16$ |
| RNA binding site                                          |                     | $0.71 \pm 0.15$ |
| Complex                                                   |                     |                 |
| All complex heavy (C, N, O, P)                            | $0.71 \pm 0.16$     |                 |
| Protein and nucleic acid heavy                            | $0.79 \pm 0.15$     |                 |

\*\* RMSD range calculated with the 20 structures of the NMR ensemble with the following residue ranges: 284-370 for the protein and 1-7 for the RNA.
